# Supplementary material for: Longer-term rates of survival and reintervention after thoracic endovascular aortic repair (TEVAR) for blunt aortic injury: a retrospective population-based cohort study from Ontario, Canada
Source: HighWire-hosted journal article supplement (doi:10.1136/tsaco-2021-000856), 2022-03-01
Supplement: tsaco-2021-000856supp001_data_supplement.pdf [file tsaco-2021-000856supp001_data_supplement.pdf]

**SUPPLEMENTARY ONLINE CONTENT**

**Supplementary Table 1.** Description of administrative databases used in the study.

| <b>Database</b>                                   | <b>Description</b>                                                                                                      |
|---------------------------------------------------|-------------------------------------------------------------------------------------------------------------------------|
| CIHI Discharge Abstract Database (CIHI-DAD)       | Demographic, administrative, and clinical data on acute care hospital separations in Ontario.                           |
| National Ambulatory Care Reporting System (NACRS) | Captures administrative, demographic, and clinical data for emergency department and ambulatory care visits in Ontario. |
| Ontario Health Insurance Plan (OHIP)              | Claims data for services provided by eligible providers (includes physicians, nurse practitioners, and laboratories).   |
| Ontario Trauma Registry (OTR)                     | Contains diagnostic, therapeutic information, and outcomes for patients admitted to Lead Trauma Hospitals in Ontario.   |
| Ontario Registrar General Death (ORGD)            | Cause of death diagnostic codes.                                                                                        |
| Registered Persons Database (RPDB)                | Contains data on vital status for all Ontario residents that are eligible for the OHIP.                                 |

**Supplementary Table 2. Key variable definitions used in the study.**

| Variable                                    | Database (Codes)                                                                                                                                                                                                                                                                                                                                                                                         |
|---------------------------------------------|----------------------------------------------------------------------------------------------------------------------------------------------------------------------------------------------------------------------------------------------------------------------------------------------------------------------------------------------------------------------------------------------------------|
| <b>Inclusion and exclusion criteria</b>     |                                                                                                                                                                                                                                                                                                                                                                                                          |
| <i>Inclusion Criteria (1 +2)</i>            |                                                                                                                                                                                                                                                                                                                                                                                                          |
| 1. Aortic injury                            | CIHI-DAD, NACRS or OTR (ICD-10 CA codes): S25.0                                                                                                                                                                                                                                                                                                                                                          |
| 2. Blunt trauma                             | CIHI-DAD, NACRS or OTR (ICD-10 CA codes): V01-V89, V95-V97, V99, W09, W11-W17, W20-W49, W51-W52, X72-X74, X78-X82, X93-X96, X99-Y04, Y22-Y25, Y28-Y32                                                                                                                                                                                                                                                    |
| <i>Exclusion Criteria</i>                   |                                                                                                                                                                                                                                                                                                                                                                                                          |
| Penetrating trauma                          | CIHI-DAD, NACRS or OTR (ICD-10 CA codes): S25.0                                                                                                                                                                                                                                                                                                                                                          |
| <b>Exposures</b>                            |                                                                                                                                                                                                                                                                                                                                                                                                          |
| Thoracic endovascular aortic repair (TEVAR) | CIHI-DAD, NACRS or OTR (CCI codes): 1ID80GQNRN<br><br>OHIP fee code: R875, or E627                                                                                                                                                                                                                                                                                                                       |
| Surgical repair                             | CIHI-DAD, NACRS or OTR (ICD-10 CA codes): 1IA57LAGXN, 1IA79LA, 1ID80LA, 1ID80LAXXA, 1ID80LAXXK, 1ID80LAXXN, 1ID80LAXXQ, 1ID80QFXXA, 1ID80QFXXK, 1ID80QFXXN, 1ID80QFXXQ, 1ID82LA, 1ID82LAXXA, 1ID82LAXXN, 1ID82LAXXQ, 1ID87LA, 1ID87LAXXA, 1ID87LAXXK, 1ID87LAXXN, 1ID87LAXXQ, 1ID87QFXXA, 1ID87QFXXK, 1ID87QFXXN, 1ID87QFXXQ<br><br>OHIP fee codes: R830, R831, R832, E659, E667, R799, R800, R801, E667 |
| Hybrid repair                               | CIHI-DAD, NACRS or OTR (CCI codes) and/or OHIP fee codes for TEVAR <i>and</i> surgical repair (as above)                                                                                                                                                                                                                                                                                                 |
| Non-operative management                    | CIHI-DAD, NACRS or OTR (CCI codes) and/or OHIP fee codes: No codes for either TEVAR or open surgical repair (as above)                                                                                                                                                                                                                                                                                   |
| <b>Covariates</b>                           |                                                                                                                                                                                                                                                                                                                                                                                                          |
| External causes of injury                   | CIHI-DAD ICD10CA codes:                                                                                                                                                                                                                                                                                                                                                                                  |

|                                                                              |                                                                                                                                                                                                                                                                                      |
|------------------------------------------------------------------------------|--------------------------------------------------------------------------------------------------------------------------------------------------------------------------------------------------------------------------------------------------------------------------------------|
| Motor vehicle collision                                                      | V01-V79, X82                                                                                                                                                                                                                                                                         |
| Other transport collisions                                                   | V80-V89, V95-V99, Y03                                                                                                                                                                                                                                                                |
| Person struck                                                                | W20-W31, W36-W52, X81                                                                                                                                                                                                                                                                |
| Fall from height                                                             | W11-W19, X80                                                                                                                                                                                                                                                                         |
| Other                                                                        | None of the above codes                                                                                                                                                                                                                                                              |
| Associated injuries                                                          | CIHI-DAD ICD10CA codes:                                                                                                                                                                                                                                                              |
| Skull fracture and/or traumatic brain injury                                 | S02.0, S02.000, S02.001, S02.1, S02.100, S02.101, S06-S09                                                                                                                                                                                                                            |
| Cervical spine fracture and/or cervical spinal cord injury                   | S12.0, S12.1, S12.2, S12.7, S12.9, S14.0, S14.1, S14.2, S14.5                                                                                                                                                                                                                        |
| Severe chest injury                                                          | S27.41, S27.48, S27.51, S27.58, S27.71, S27.78, S27.8, S27.9, S28                                                                                                                                                                                                                    |
| Severe abdominal visceral injury                                             | S35, S36.02, S36.03, S36.04, S36.12, S36.13, S36.14, S36.18, S36.22, S36.23, S36.24, S36.31, S36.41, S36.42, S36.46, S36.51, S36.61, S36.71, S36.78, S36.81, S36.91, S37.02, S37.03, S37.11, S37.21, S37.61, S37.71, S37.81, S37.91, S38.2, S38.3, S39.6, T04.1, T04.7, T05.8, T06.5 |
| Open fracture of a long bone                                                 | S42.2_1, S42.3_1, S42.4_1, S52.0_1, S52.1_1, S52.201, S52.301, S52.401, S52.701, S52.801, S52.901, S72.0_1, S72.1_1, S72.201, S72.301, S72.4_1, S72.701, S72.801, S72.901, S82.101, S82.201, S82.301, S82.701, S82.901, T02.21, T02.31, T02.41, T02.51, T02.61                       |
| Type of aortic injury                                                        | OTR AIS predot code:                                                                                                                                                                                                                                                                 |
| Aorta, thoracic not further specified (NFS)                                  | 420299.4                                                                                                                                                                                                                                                                             |
| Intimal tear, no disruption                                                  | 420202.4, 420204.5                                                                                                                                                                                                                                                                   |
| Laceration; perforation; puncture NFS                                        | 420206.4                                                                                                                                                                                                                                                                             |
| Minor; superficial; incomplete circumferential involvement; blood loss <=20% | 420208.4                                                                                                                                                                                                                                                                             |
|                                                                              | 420210.5, 420212.5, 420216.5, 420218.6                                                                                                                                                                                                                                               |

Major; rupture; transection; segmental loss; blood loss >20%

### Outcomes

|                                                        |                                                                                                                                                    |
|--------------------------------------------------------|----------------------------------------------------------------------------------------------------------------------------------------------------|
| Survival to maximum follow-up                          | RPDB: vital status “alive”                                                                                                                         |
| Aortic reintervention                                  | CIHI-DAD, NACRS or OTR (CCI codes): Any code listed for TEVAR or open surgical repair under “exposures”                                            |
| Stroke                                                 | CIHI-DAD or NACRS (ICD-10 CA codes): I63, I64                                                                                                      |
| Chronic renal failure with dialysis                    | CIHI-DAD or NACRS (ICD-10 CA codes for Chronic renal failure): N18 <i>plus</i><br>CIHI-DAD or NACRS (CCI codes for dialysis): 1PZ21HPD4, 1PZ21HQBR |
| Death from Aortic dissection, rupture, or complication | ORGD (ICD-10 CA codes): I71, S25.0, T82.3                                                                                                          |

AIS: Abbreviated injury score, CCI: Canadian Classification of Interventions, CIHI-DAD: CIHI Discharge Abstract Database, ICD-10 CA: International Classification of Diseases 10<sup>th</sup> Edition (Canadian), NACRS: National Ambulatory Care Reporting System, OHIP: Ontario health insurance plan, OTR: Ontario Trauma Registry, RPDB: Registered Persons Database.
